# Supplementary material
Source: Springer Nature journal article supplement (https://www.springermedizin.de/resource/supplementary/12889_2006_1021_MOESM4_ESM.pdf/9503152)

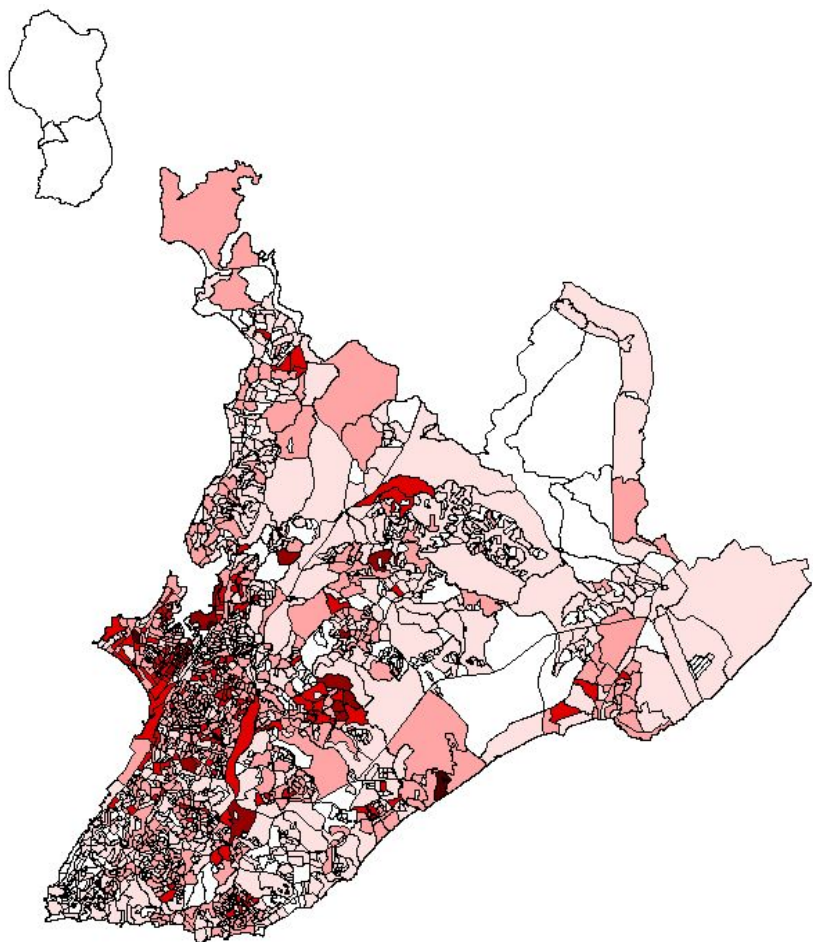

Casos.shp

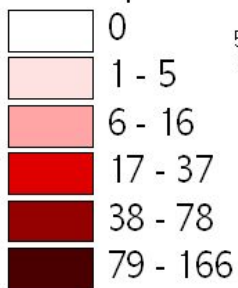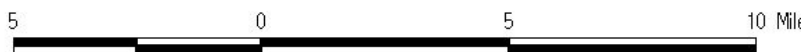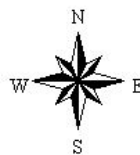

Supplement: MOESM4 [file 9503152]
